# Supplementary material for: Highly efficient orange phosphorescent organic light-emitting diodes based on an iridium(iii) complex with diethyldithiocarbamate (S^S) as the ancillary ligand
Source: Royal Society of Chemistry journal article supplement (doi:10.1039/c6ra12529h), 2016-01-01
Supplement: c6ra12529h1.pdf [file c6ra12529h1.pdf]

# Highly Efficient Orange Phosphorescent Organic Light-Emitting Diodes Based on Iridium (III) Complex with Diethyldithiocarbamate (S<sup>^</sup>S) as the Ancillary Ligand

Qunbo Mei,<sup>\*,a</sup> Chen Chen,<sup>a</sup> Ruqiang Tian,<sup>a</sup> Min Yang,<sup>a</sup> Bihai Tong,<sup>b</sup> Qingfang Hua,<sup>a</sup> Yujie Shi,<sup>a</sup> Quli Fan,<sup>a</sup> Shanghai Ye,<sup>\*,a</sup>

<sup>a</sup>Key Laboratory for Organic Electronics and Information Displays & Institute of Advanced Materials(IAM), Jiangsu National Synergetic Innovation Center for Advanced Materials (SICAM), Nanjing University of Posts & Telecommunications, 9 Wenyuan Road, Nanjing 210023, China;

<sup>b</sup>College of Metallurgy and Resources, Anhui University of Technology, Ma'anshan, Anhui 243002, P. R. China;

\* Corresponding author. e-mail: iamqbmei@njupt.edu.cn; iamshye@njupt.edu.cn; iamwhuang@njupt.edu.cn

## Contents

1. GC-MS, High Resolution MS Spectra, 1H-NMR, 13C NMR Spectra and EI-MS spectra
2. The X-ray crystallography of Ir(dpp)<sub>2</sub>(dta)
3. Life time of Ir(dpp)<sub>2</sub>(dta)
4. Electrochemical properties of ferrocene/ferricenium (Fc/Fc+) and Ir(dpp)<sub>2</sub>(dta)
5. Data of photophysical properties
6. PL spectra for different doping concentrations
7. The data of Ir(dpp)<sub>2</sub>dta doping density from 1% to 10%.(we need in the paper)
8. CIE plot of Ir(dpp)<sub>2</sub>(dta)
9. External quantum efficiency–Luminance of the devices

# 1. GC-MS, High Resolution MS Spectra, <sup>1</sup>H-NMR, <sup>13</sup>C NMR Spectra and EI-MS spectra

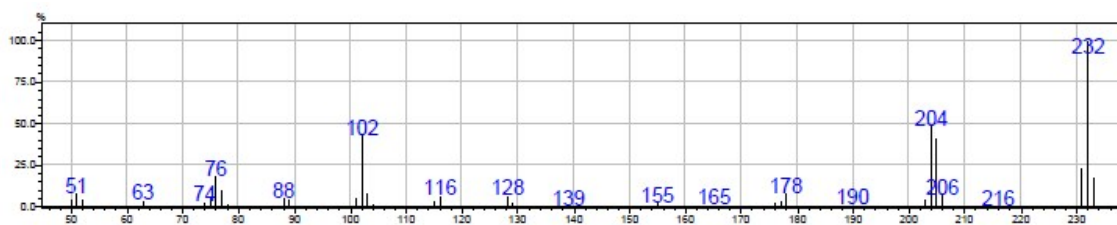

Figure S1. GC-MS of 4,6-Diphenyl pyrimidine in THF

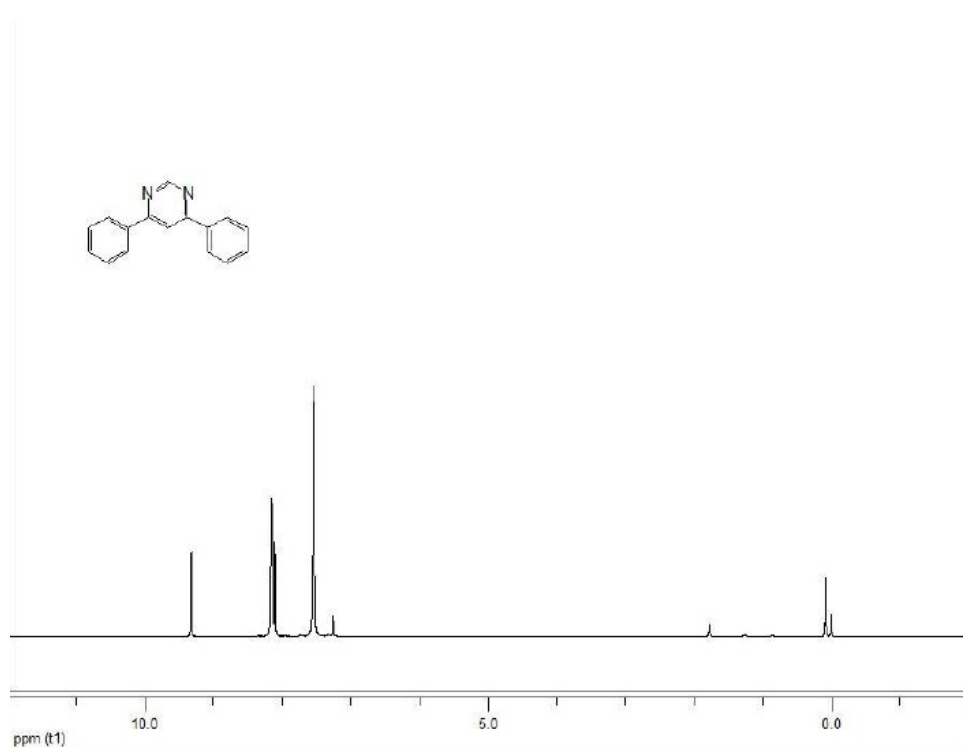

Figure S2. <sup>1</sup>H NMR of 4,6-Diphenyl pyrimidine in CDCl<sub>3</sub>

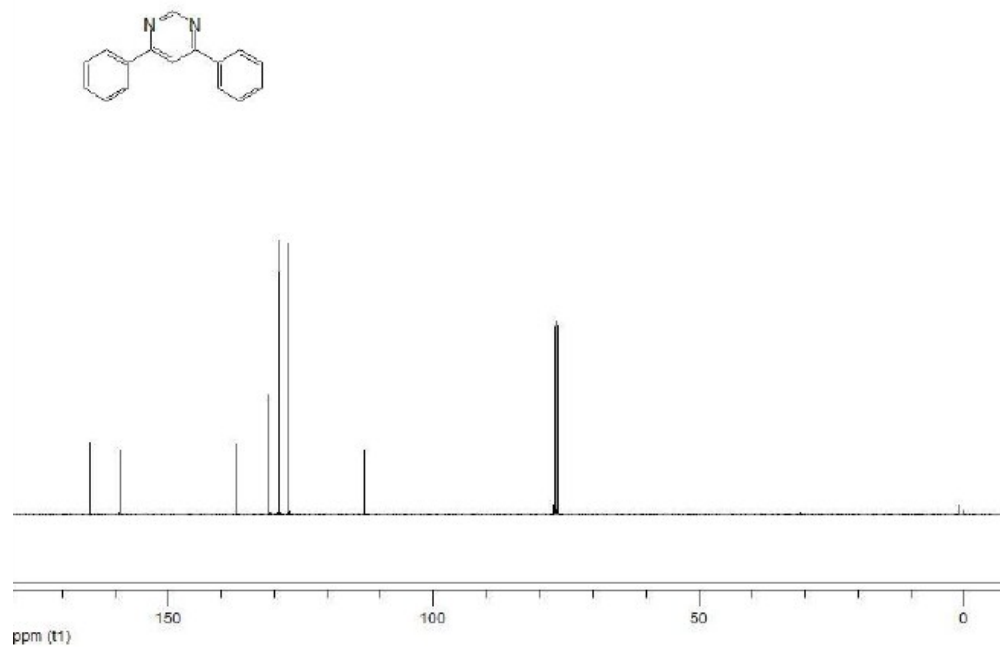

Figure S3.  $^{13}\text{C}$  NMR of 4,6-Diphenyl pyrimidine in  $\text{CDCl}_3$

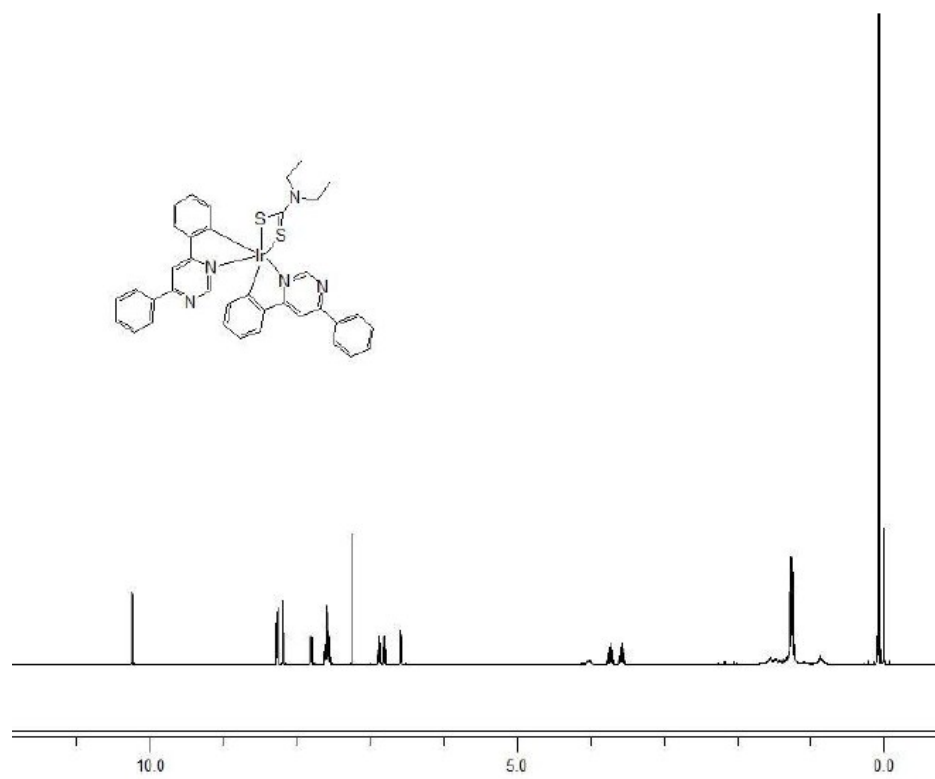

Figure S4.  $^1\text{H}$  NMR of  $\text{Ir}(\text{dpp})_2\text{dta}$  in  $\text{CDCl}_3$

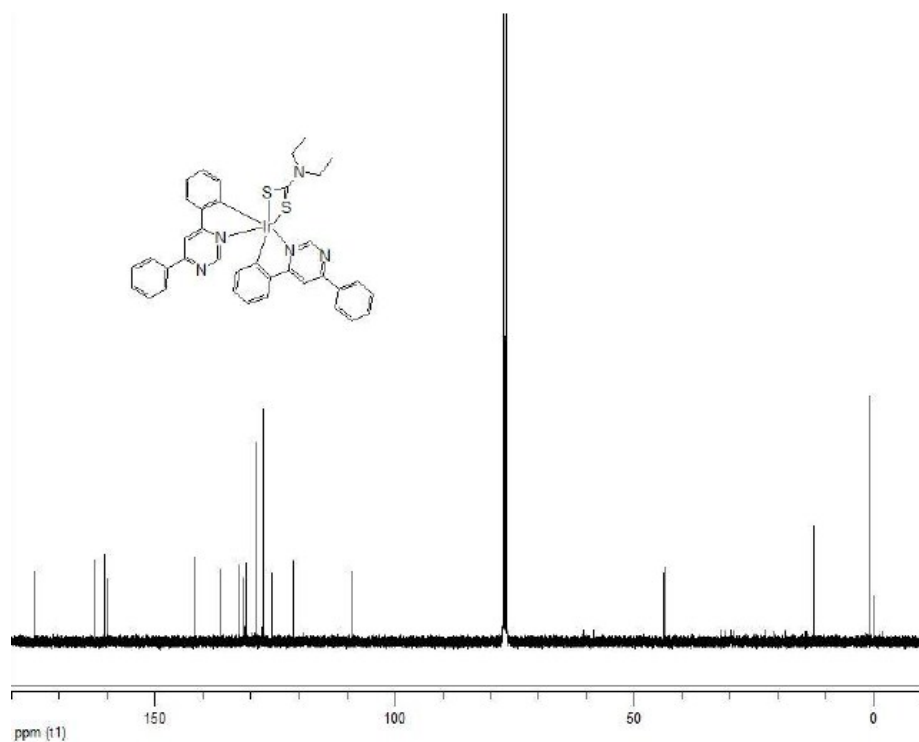

Figure S5.  $^{13}\text{C}$  NMR of  $\text{Ir}(\text{dpp})_2\text{dta}$  in  $\text{CDCl}_3$

### $\text{Ir}(\text{dpp})_2(\text{dta})$

Spectrum from 1030pos11.wiff (sample 1) - Sample011, Experiment 1, +TOF MS (100 - 2000) from 0.213 to 0.456 min

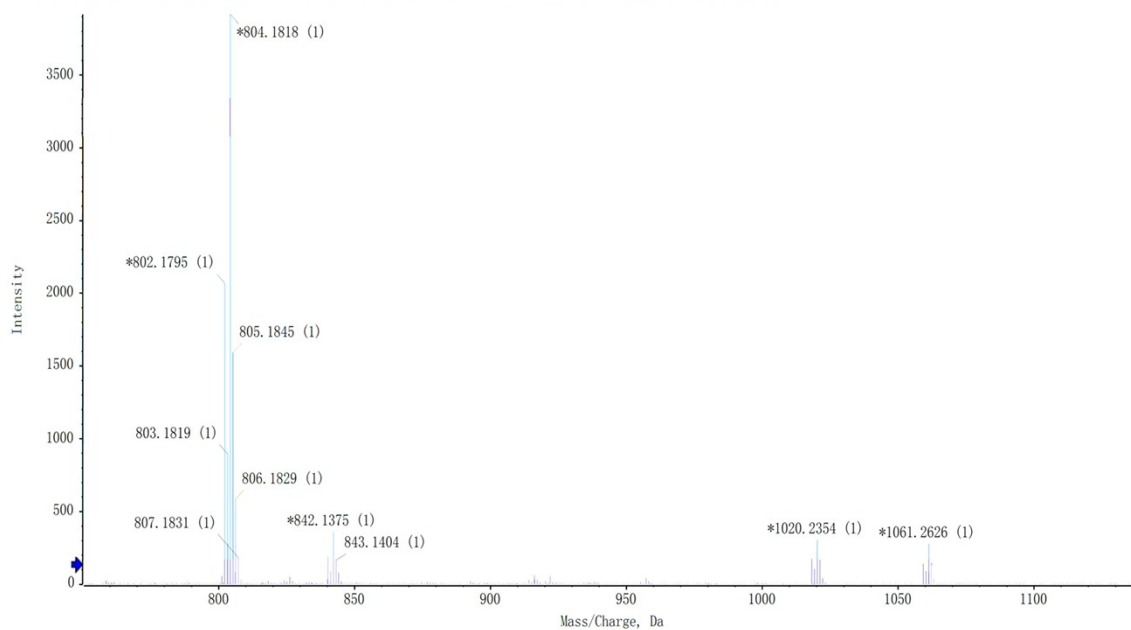

Figure S6. High resolution MS spectra of  $\text{Ir}(\text{dpp})_2(\text{dta})$ .

## 2.The X-ray crystallography of Ir(dpp)<sub>2</sub>(dta)

(CCDC 1402238 contains the supplementary crystallographic data for this paper. These data can be obtained free of charge from The Cambridge Crystallographic Data Centre via <https://www.ccdc.cam.ac.uk/deposit>)

Table S1. Crystal data and structure refinement for Ir(dpp)<sub>2</sub>(dta).

| Identification code             | <b>Ir(dpp)<sub>2</sub>(dta)</b>                                                                                                         |
|---------------------------------|-----------------------------------------------------------------------------------------------------------------------------------------|
| Empirical formula               | C <sub>37</sub> H <sub>32</sub> Ir N <sub>5</sub> S <sub>2</sub>                                                                        |
| Formula weight                  | 804.00                                                                                                                                  |
| Temperature                     | 293 K                                                                                                                                   |
| Wavelength                      | 0.71073 Å                                                                                                                               |
| space group                     | P-1                                                                                                                                     |
| Unit cell dimensions            | a = 10.4442(7) Å    alpha = 72.086(1) deg.<br>b = 13.1344(10) Å    beta = 88.803(2) deg.<br>c = 15.5974(12) Å    gamma = 81.704(1) deg. |
| Volume                          | 2014.0(3) Å <sup>3</sup>                                                                                                                |
| Z, Calculated density           | 2, 1.464 Mg/m <sup>3</sup>                                                                                                              |
| Absorption coefficient          | 3.583 mm <sup>-1</sup>                                                                                                                  |
| F(000)                          | 880.0                                                                                                                                   |
| F(000)                          | 878.47                                                                                                                                  |
| Theta range for data collection | 2.35 to 27.45 deg.                                                                                                                      |
| Reflections collected / unique  | 10037 / 9736                                                                                                                            |
| Data completeness               | 97.0 %                                                                                                                                  |
| Max. and min. transmission      | 0.616 and 0.506                                                                                                                         |
| Final R indices [I>2sigma(I)]   | R1 = 0.0354, wR2 = 0.0963                                                                                                               |

Table S2. Bond lengths [Å] and angles [deg] for Ir(dpp)<sub>2</sub>(dta).

|                   |            |
|-------------------|------------|
| Ir(2)-C(38)       | 2.009(4)   |
| Ir(2)-C(54)       | 2.019(4)   |
| Ir(2)-N(7)        | 2.051(3)   |
| Ir(2)-N(9)        | 2.048(3)   |
| Ir(2)-S(1)        | 2.4644(9)  |
| Ir(2)-S(2)        | 2.44785(9) |
| C(38)-Ir(2)-C(54) | 89.96(15)  |
| C(38)-Ir(2)-N(9)  | 96.11(14)  |

|                  |            |
|------------------|------------|
| C(54)-Ir(2)-N(9) | 80.00(14)  |
| C(38)-Ir(2)-N(7) | 80.02(14)  |
| C(54)-Ir(2)-N(7) | 93.21(14)  |
| N(9)-Ir(2)-N(7)  | 172.23(11) |
| C(38)-Ir(2)-S(1) | 98.97(10)  |
| C(54)-Ir(2)-S(1) | 170.71(11) |
| N(9)-Ir(2)-S(1)  | 96.42(9)   |
| N(7)-Ir(2)-S(1)  | 90.85(9)   |
| C(38)-Ir(2)-S(2) | 170.01(10) |
| C(54)-Ir(2)-S(2) | 99.75(11)  |
| N(9)-Ir(2)-S(2)  | 87.94(9)   |
| N(7)-Ir(2)-S(2)  | 96.98(9)   |
| S(1)-Ir(2)-S(2)  | 71.44(3)   |

### 3. Life time of Ir(dpp)<sub>2</sub>(dta)

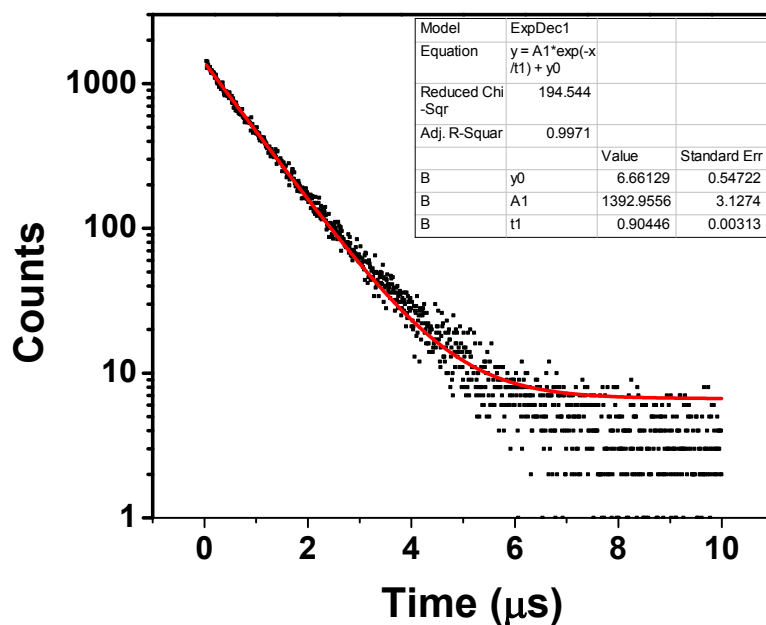

Fig.S7 Life time of Ir(dpp)<sub>2</sub>(dta) in 1% PMMA film.

### 4. Electrochemical properties of ferrocene/ferricenium (Fc/Fc<sup>+</sup>) and Ir(dpp)<sub>2</sub>(dta).

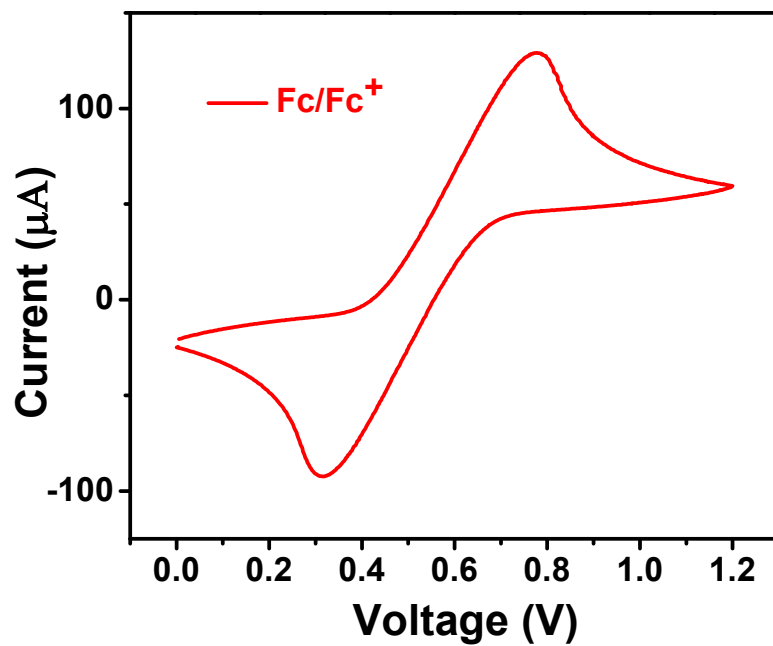

Fig.S8 Cyclic voltammogram of ferrocene/ferricenium (Fc/Fc<sup>+</sup>)

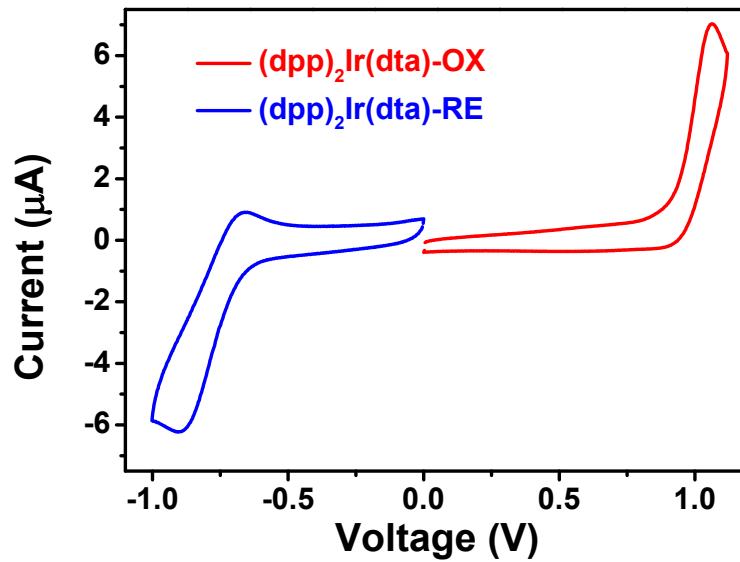

Fig.S9 Cyclic voltammogram of Ir(dpp)<sub>2</sub>(dta)

## 5. Data of Photophysical properties

Table S3. Data of Photophysical properties of Ir(dpp)<sub>2</sub>(dta).

|                            | DCM solution                     | 1% PMMA film               |             | Powder               |                       |
|----------------------------|----------------------------------|----------------------------|-------------|----------------------|-----------------------|
|                            | $\lambda_{\text{max, abs}}$ (nm) | $\lambda_{\text{PL}}$ (nm) | $\tau$ (us) | $\Phi_{\text{film}}$ | $\Phi_{\text{power}}$ |
| (dpp) <sub>2</sub> Ir(dta) | 304, 398, 503                    | 575                        | 0.90        | 86%                  | 14%                   |

## 6. PL spectra for different doping concentrations

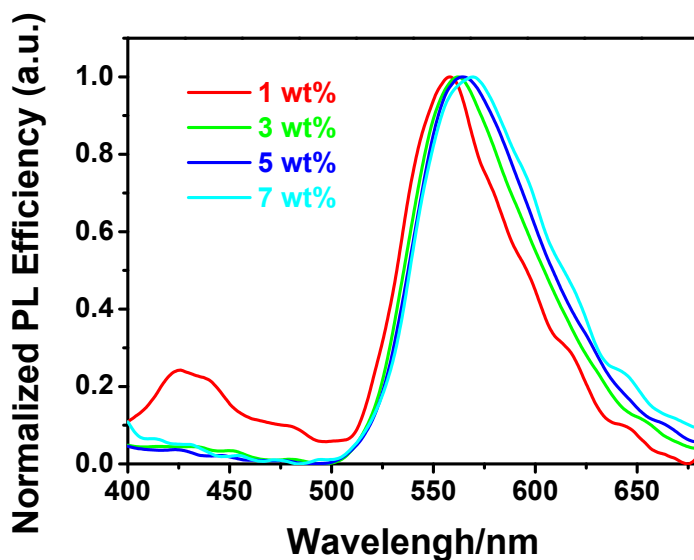

Fig.S10 PL spectra for different doping concentrations

## 7. The data of Ir(dpp)<sub>2</sub>dta doping density from 1% to 10%

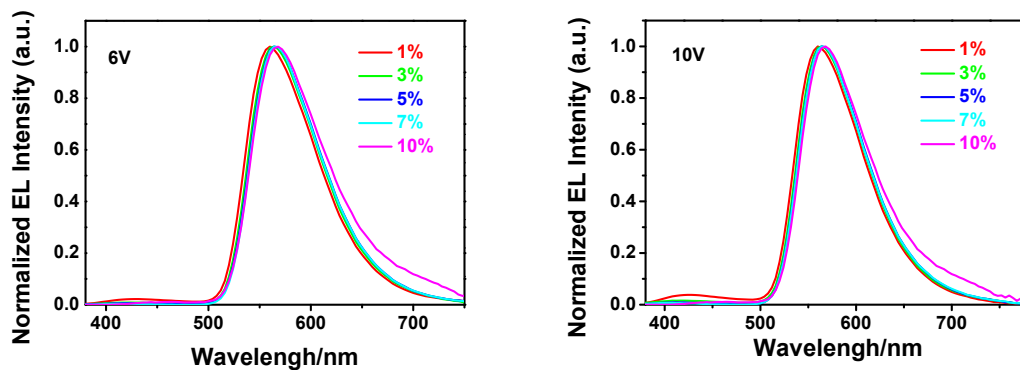



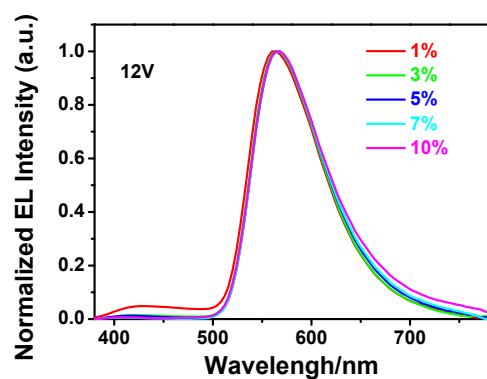

Fig.S11 Electroluminescence spectra of the devices at different density

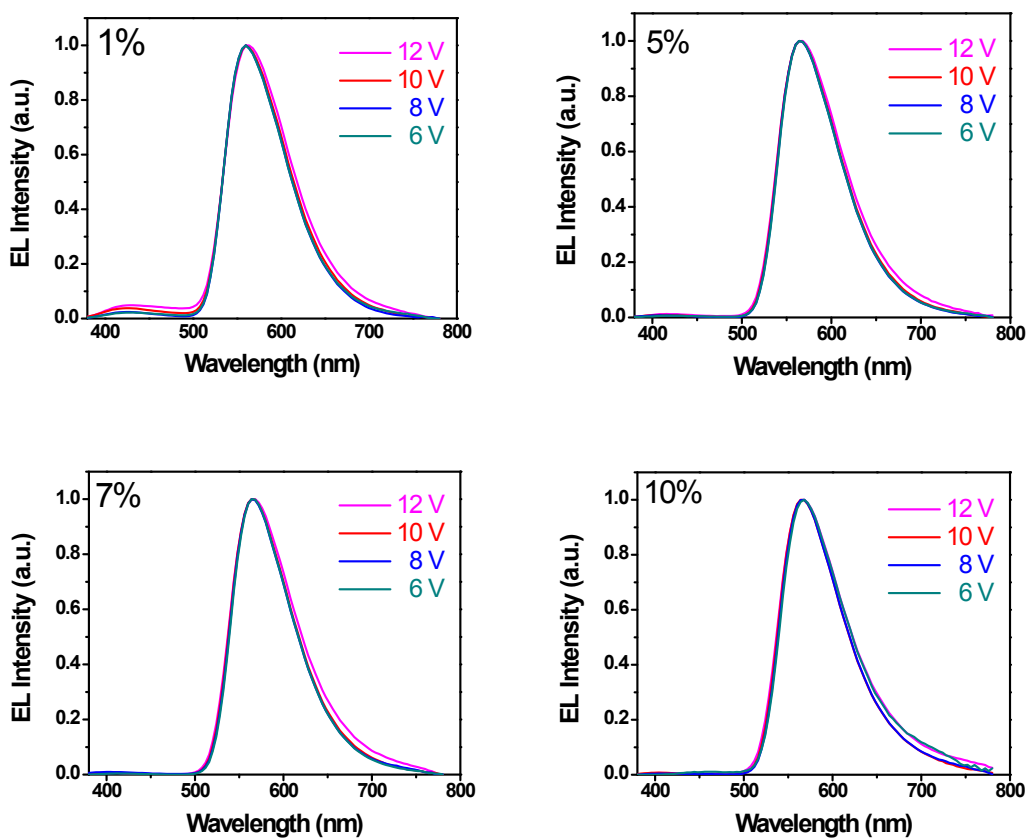

Fig.S12 Electroluminescence spectra of the devices at different voltage

### 8. CIE plot of $\text{Ir}(\text{dpp})_2(\text{dta})$

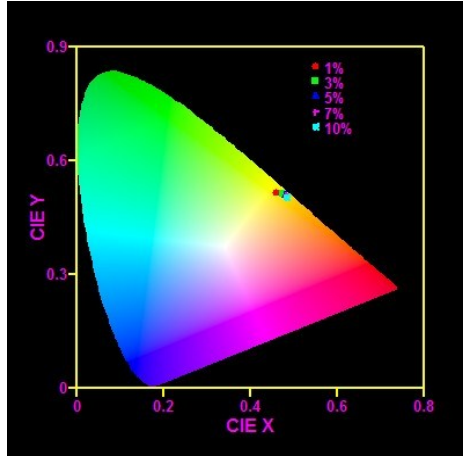

Fig.S13 CIE plot of Ir(dpp)<sub>2</sub>(dta)

### 9. External quantum efficiency–Luminance of the devices

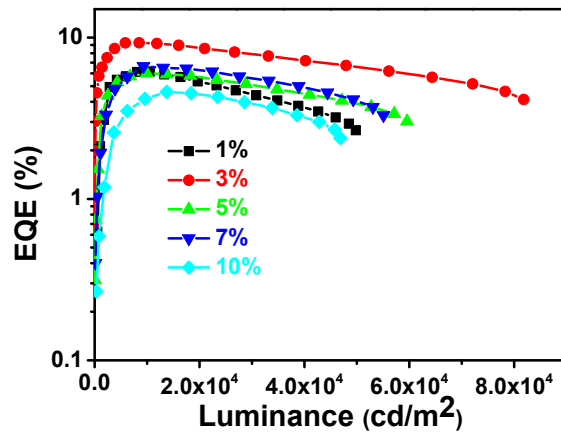

Fig.S14 External quantum efficiency–Luminance of the devices
